# Supplementary material for: Antivirulence Activity of the Human Gut Metabolome
Source: PubMed Central journal article supplement — mBio. 2014 Jul 29;5(4):e01183-14. doi: 10.1128/mBio.01183-14 (PMC4128352; doi:10.1128/mbio.01183-14), 2014-07-29
Supplement: mbo004141918st1.pdf [file mbo004141918st1.pdf]

**Table S1. Bacterial strains used in this study.**

| Species                             | Strain         | Source <sup>a</sup>                                                  | Reference <sup>b</sup>                                       |
|-------------------------------------|----------------|----------------------------------------------------------------------|--------------------------------------------------------------|
| <i>Alistipes shahii</i>             | 4-1            | Donor A                                                              | This work                                                    |
| <i>Alistipes finegoldii</i>         | 4-24           | Donor A                                                              | This work                                                    |
| <i>Bacteroides caccae</i>           | 10-2I          | Donor A                                                              | This work                                                    |
| <i>Bacteroides uniformis</i>        | 10-2B          | Donor A                                                              | This work                                                    |
| <i>Bacteroides ovatus</i>           | 4-5            | Donor A                                                              | This work                                                    |
|                                     | 10-4X          | Donor A                                                              | This work                                                    |
|                                     | MM-V6-C        | Donor A                                                              | This work                                                    |
|                                     | MM-V6-D        | Donor A                                                              | This work                                                    |
| <i>Bacteroides thetaiotaomicron</i> | FM-V6-A        | Donor A                                                              | This work                                                    |
| <i>Bifidobacterium adolescentis</i> | 4-40           | Donor A                                                              | This work                                                    |
| <i>Blautia luti</i>                 | 4-33B          | Donor A                                                              | This work                                                    |
| <i>Citrobacter freundii</i>         | MM-V6-F        | Donor A                                                              | This work                                                    |
| <i>Clostridium hathewayi</i>        | 10-40          | Donor A                                                              | This work                                                    |
| <i>Clostridium subterminale</i>     | 10-2J          | Donor A                                                              | This work                                                    |
| <i>Clostridium symbiosum</i>        | 10-2R          | Donor A                                                              | This work                                                    |
| <i>Clostridium aldenense</i>        | 16-6-S 15-L-S  | Donor C                                                              | This work                                                    |
|                                     | 4-8            | Donor A                                                              | This work                                                    |
|                                     | WAL18727       | Feces from healthy female child                                      | HMP reference strain                                         |
|                                     | 22-5 3 13D6FAA | Donor B                                                              | This work                                                    |
| <i>Clostridium asparagiforme</i>    | WAL19147       | Isolated from human peritoneal fluid                                 | HMP reference strain                                         |
|                                     | 1/7/47FAA      | Sigmoid colon biopsy specimen from 25-year-old female with active CD | HMP reference strain                                         |
|                                     | CCUG48471      | Human feces                                                          | CCUG                                                         |
| <i>Clostridium bolteae</i>          | 10-2P          | Donor A                                                              | This work                                                    |
|                                     | 22-5-S 3D6FAA  | Donor B                                                              | This work                                                    |
|                                     | FM-V6-B        | Donor A                                                              | This work                                                    |
|                                     | WAL14578       | Feces from autistic male child                                       | HMP reference strain                                         |
| <i>Clostridium citroniae</i>        | WAL16351       | Feces from autistic child                                            | HMP reference strain                                         |
|                                     | FM-V5D         | Donor A                                                              | This work                                                    |
|                                     | FM-V5E         | Donor A                                                              | This work                                                    |
|                                     | WAL19142       | Human peritoneal fluid                                               | HMP reference strain                                         |
|                                     | WAL17108       | Feces from autistic male child                                       | HMP reference strain                                         |
| <i>Clostridium clostridioforme</i>  | 16-6-S 4LS     | Donor C                                                              | This work                                                    |
|                                     | 2/1/49FAA      | Cecum biopsy sample from a 28-year-old male with active UC           | HMP reference strain                                         |
|                                     | 4-30           | Donor A                                                              | This work                                                    |
|                                     | ATCC29084      | Human feces                                                          | ATCC                                                         |
|                                     | CC43001H       | Colon cancer tumor biopsy tissue                                     | M. Castellarin <i>et al.</i> , Genome Res. 22:299-306, 2012. |
|                                     | CC43001JA      | Colon cancer tumor biopsy tissue                                     | M. Castellarin <i>et al.</i> , Genome Res. 22:299-306, 2012. |
| <i>Clostridium innocuum</i>         | ATCC29084      | Human feces                                                          | ATCC                                                         |
|                                     | WAL7855        | Appendix tissue from adult male                                      | HMP reference strain                                         |
| <i>Clostridium saccharolyticum</i>  | 10-4J          | Donor A                                                              | This work                                                    |
| <i>Clostridium scindens</i>         | 4-12           | Donor A                                                              | This work                                                    |
| <i>Enterobacter ludwigii</i>        | 10-2F          | Donor A                                                              | This work                                                    |
|                                     | BBE-V6-A       | Donor A                                                              | This work                                                    |

|                                    |         |                                  |                                                                   |
|------------------------------------|---------|----------------------------------|-------------------------------------------------------------------|
| <i>Escherichia/Shigella</i>        | MM-V5-A | Donor A                          | This work                                                         |
| <i>Herbaspirillum</i>              | 10-2D   | Donor A                          | This work                                                         |
| <i>Megasphaera micronuciformis</i> | 10-4B   | Donor A                          | This work                                                         |
|                                    | 10-4D   | Donor A                          | This work                                                         |
| <i>Salmonella enterica</i>         | SL1344  | Bowel of calf with salmonellosis | J. D. Rankin, and R.<br>J. Taylor, Vet. Rec.<br>78:706-707, 1966. |

---

<sup>a</sup>CD: Crohn's disease; UC: ulcerative colitis. <sup>b</sup>ATCC: American Type Culture Collection; CCUG: Culture Collection, University of Göteborg; HMP: Human Microbiome Project.
